# Supplementary material
Source: ML conference proceedings conference paper supplement (https://proceedings.neurips.cc/paper_files/paper/2022/hash/620317fb69899dbf58798d242a58d351-Abstract.html)
Supplement: Supplementary file 1 [file 620317fb69899dbf58798d242a58d351-Supplemental-Conference.zip]

Archive with 2 entries (2 files):
- Supplementary.pdf
- demo.mp4
